# Supplementary material
Source: publisher figshare collection journal article supplement (https://acs.figshare.com/ndownloader/files/28102246)
Supplement: Supplementary file 1 [file 28102246]

---

# Supporting Information

## **Dual Resistance and Impedance Investigation: Ultrasensitive and Stable Humidity Detection of Molybdenum Disulfide Nanosheets-Polyethylene Oxide Hybrids**

**Yanjie Wang<sup>a</sup>, Yong Zhou<sup>\*a</sup>, Guangzhong Xie<sup>b</sup>, Jing Li<sup>a</sup>, Yuhang Wang<sup>a</sup>, Xiaoyu Liu<sup>c</sup>, Zhigang Zang<sup>a</sup>**

*<sup>a</sup>Key Laboratory of Optoelectronic Technology and System of Ministry of Education, College of Optoelectronic Engineering, Chongqing University, Chongqing 400044, PR China*

*<sup>b</sup>State Key Laboratory of Electronic Thin Films and Integrated Devices, School of Optoelectronic Science and Engineering, University of Electronic Science and Technology of China (UESTC), Chengdu 610054, PR China*

*<sup>c</sup>Chongqing University Cancer Hospital, Chongqing University, Chongqing 400030, PR China*

---

\* Corresponding author.

E-mail Address: zhyf@cqu.edu.cn (Y. Zhou).

---

## Characterization Techniques

The thickness of MoS<sub>2</sub> flakes was probed via atomic force microscopy (AFM) in tapping mode. Zeta potential was calculated from Zeta potentiometer (Omni, BRUKE, USA). The surface wetting tests were executed with Rame-Hart USA water contact angle measurement unit equipment with CCD camera. Morphological images were gathered by scanning electron microscope (SEM, ZEISS, Evo18, Germany) operated at acceleration voltage of 5 kV. The surface area and pore size distribution was determined by using TriStar II 3020 BET surface area analyser supplied by Micromeritics, USA. Fourier transform infrared spectroscopy (FTIR) was conducted by Shimadzu 8400S instrument system. X-ray diffraction spectra (XRD) was obtained by PANalytical X'pert HighScore XRD instrument with a CuK $\alpha$  radiation source. X-ray photoelectron spectroscopy (XPS) measurements were performed on an Omicron Nanotech operated at 15 kV and 20 mA current using monochromatic Al K $\alpha$  X-ray source.

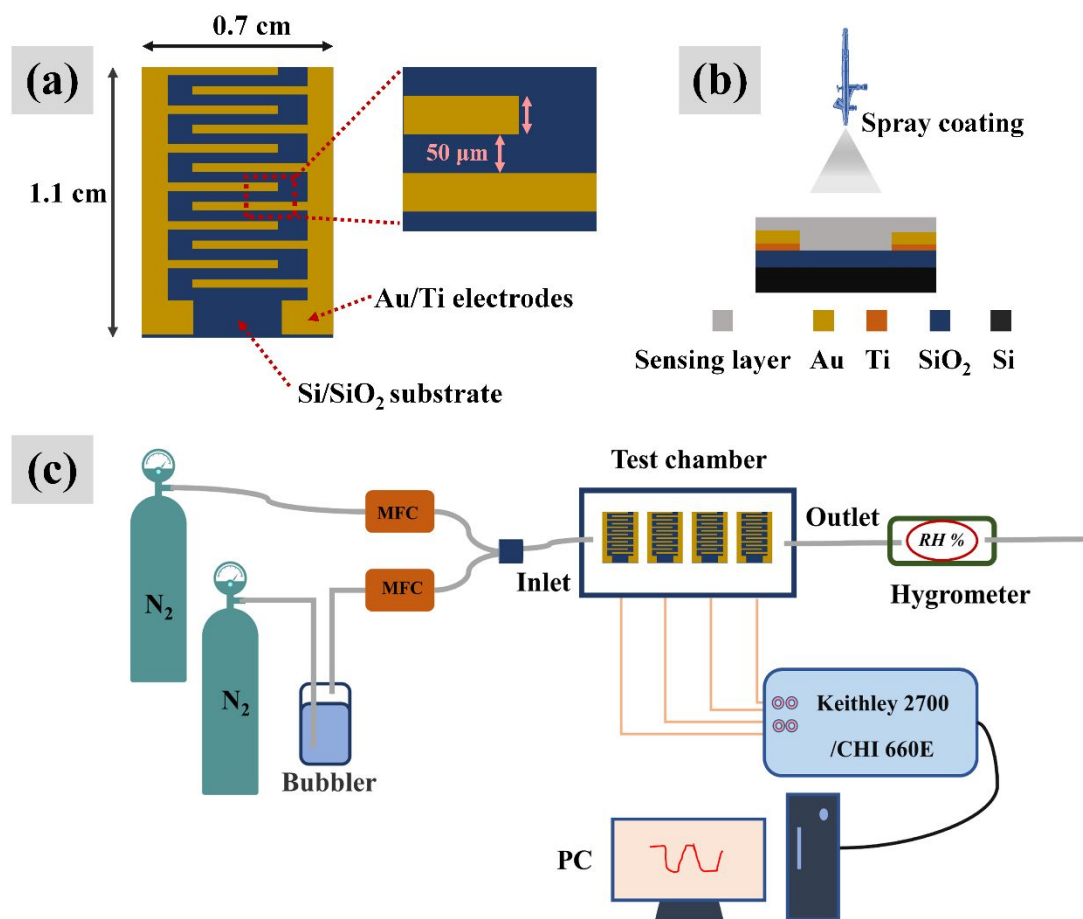

**Figure S1.** Schematic illustration of (a) IDEs device, (b) spray-coating and (c) measurement apparatus.

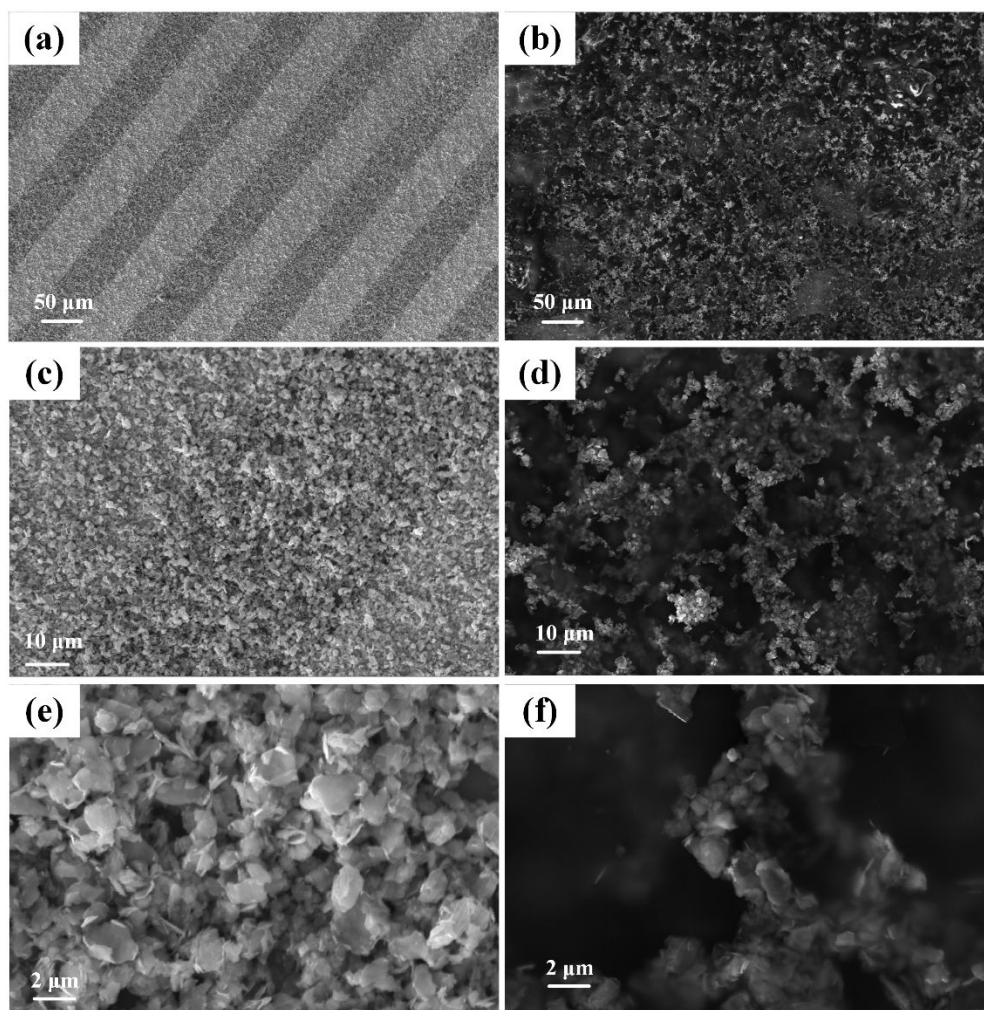

**Figure S2.** SEM images: gradual magnification of (a, c, e) MoS<sub>2</sub> and (b, d, f) MoS<sub>2</sub>-PEO composite films.

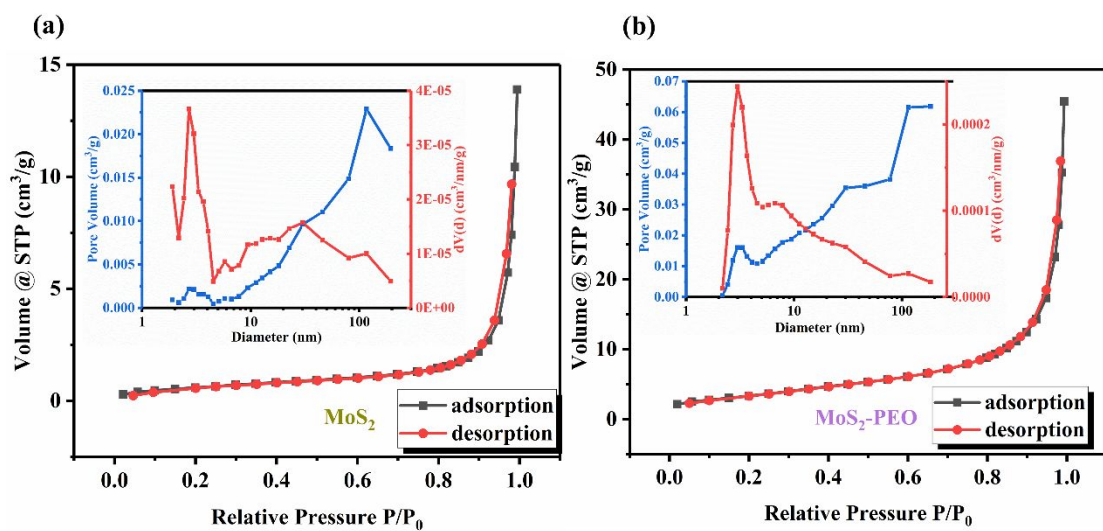

**Figure S3.** The adsorption/desorption isotherm, pore size distribution and pore volume of (a) MoS<sub>2</sub> and (b) MoS<sub>2</sub>-PEO composites.

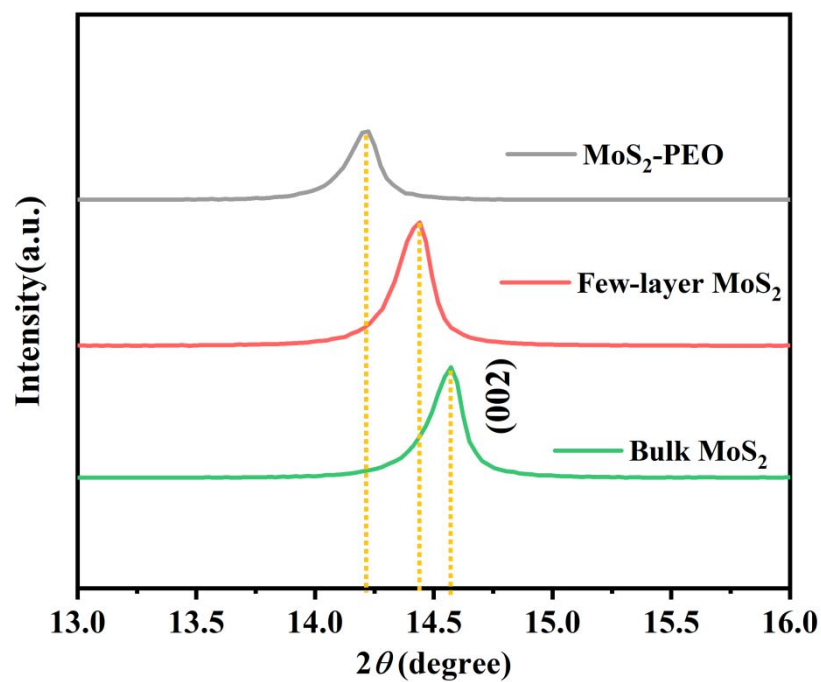

**Figure S4.** The downshift of (002) peak from bulk MoS<sub>2</sub>, few-layer MoS<sub>2</sub> to MoS<sub>2</sub>-PEO composites.

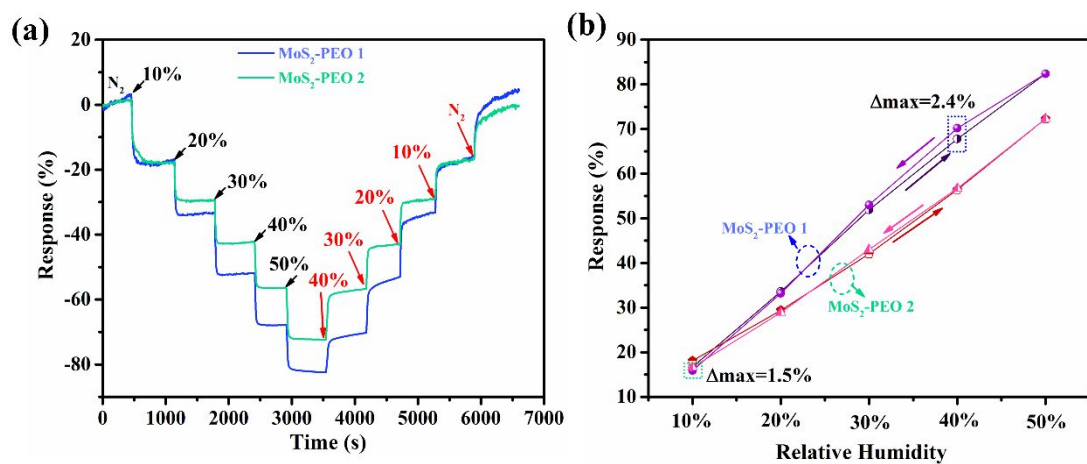

**Figure S5.** Response hysteresis of two different MoS<sub>2</sub>-PEO sensors: (a) transient response and (b) response-RH relationship during the processes of ascending/descending RH.

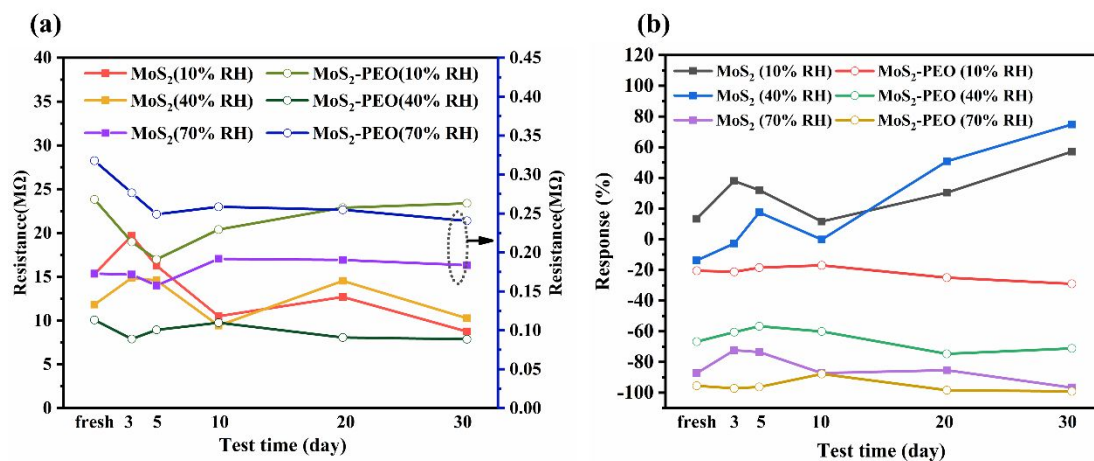

**Figure S6.** Operation stability of both MoS<sub>2</sub> and MoS<sub>2</sub>-PEO sensors in terms of (a) saturation resistance and (b) response under different RH over time.



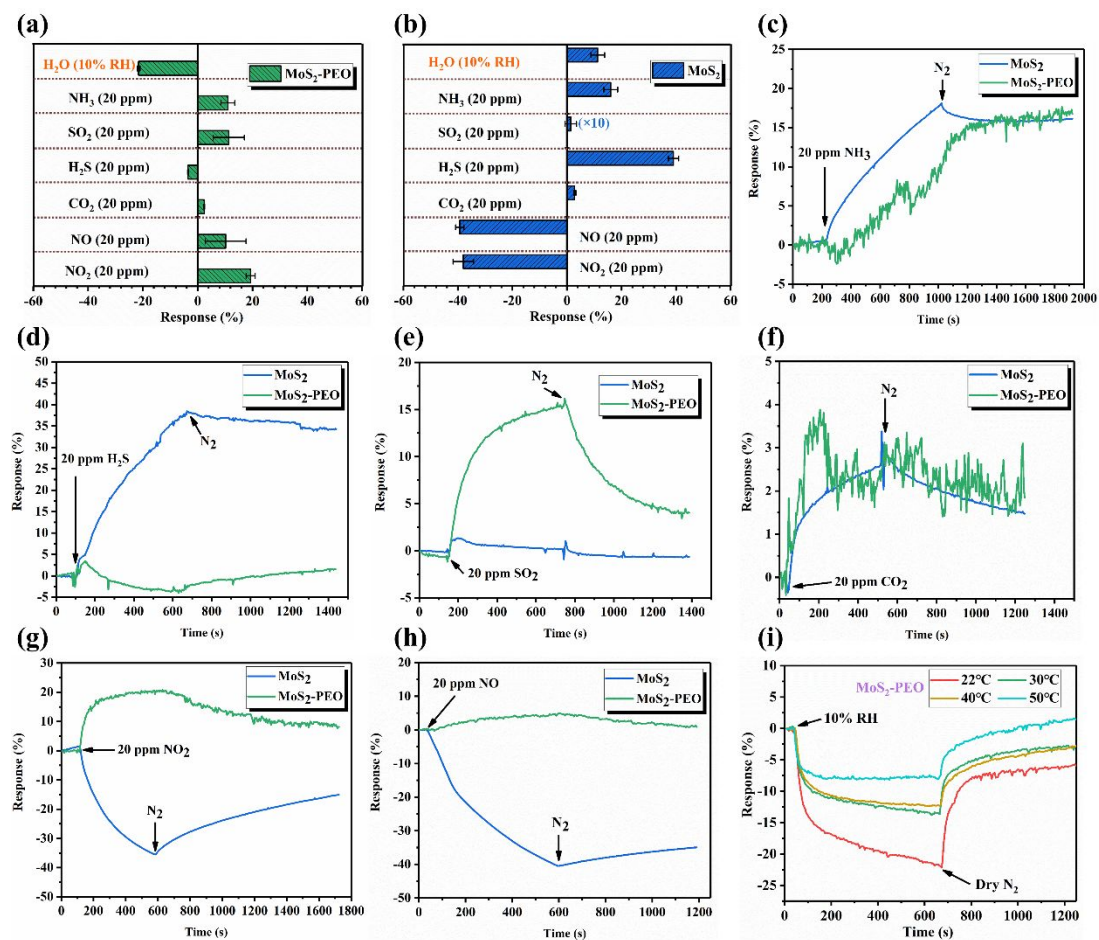

**Figure S7.** Selectivity of (a) MoS<sub>2</sub>-PEO and (b) MoS<sub>2</sub> sensors, time-resolved response of both sensors toward (c) 20 ppm NH<sub>3</sub>, (d) 20 ppm H<sub>2</sub>S, (e) 20 ppm SO<sub>2</sub>, (f) 20 ppm CO<sub>2</sub>, (g) 20 ppm NO<sub>2</sub>, and (h) 20 ppm NO<sub>2</sub> at room temperature, and (i) response transient of MoS<sub>2</sub>-PEO sensor toward 10%RH at different operation temperature.

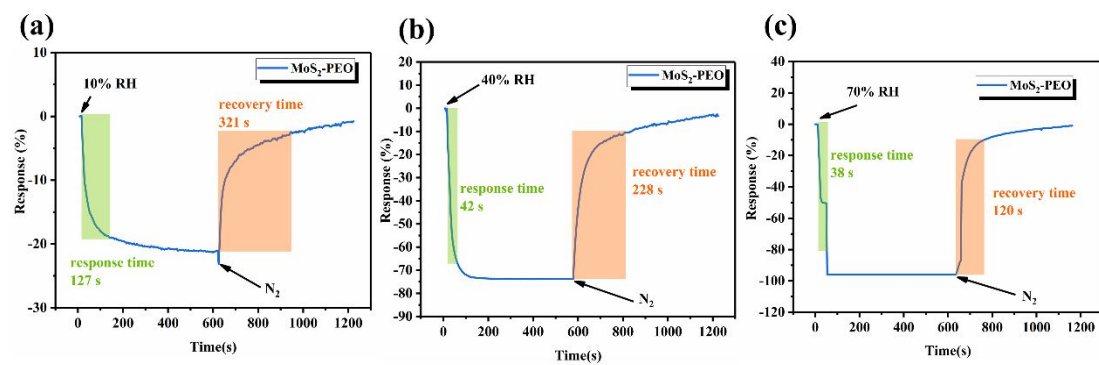

**Figure S8.** The response/recovery times of MoS<sub>2</sub>-PEO sensor toward (a) 10%RH, (b) 40%RH, and (c) 70%RH.

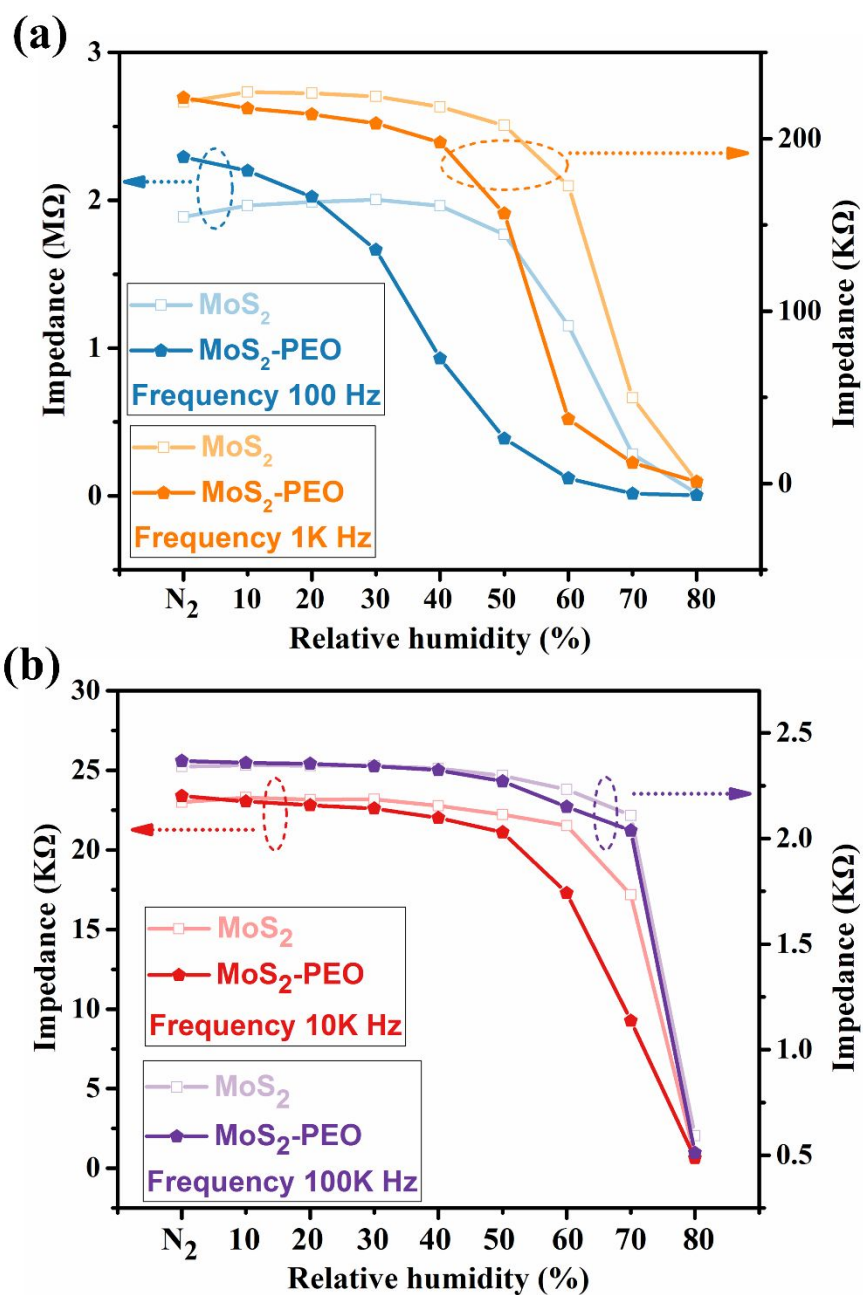

**Figure S9.** Impedance versus RH for MoS<sub>2</sub> and MoS<sub>2</sub>-PEO sensors at (a) 100 Hz, 1K Hz, and (b) 10K Hz, 100K Hz.

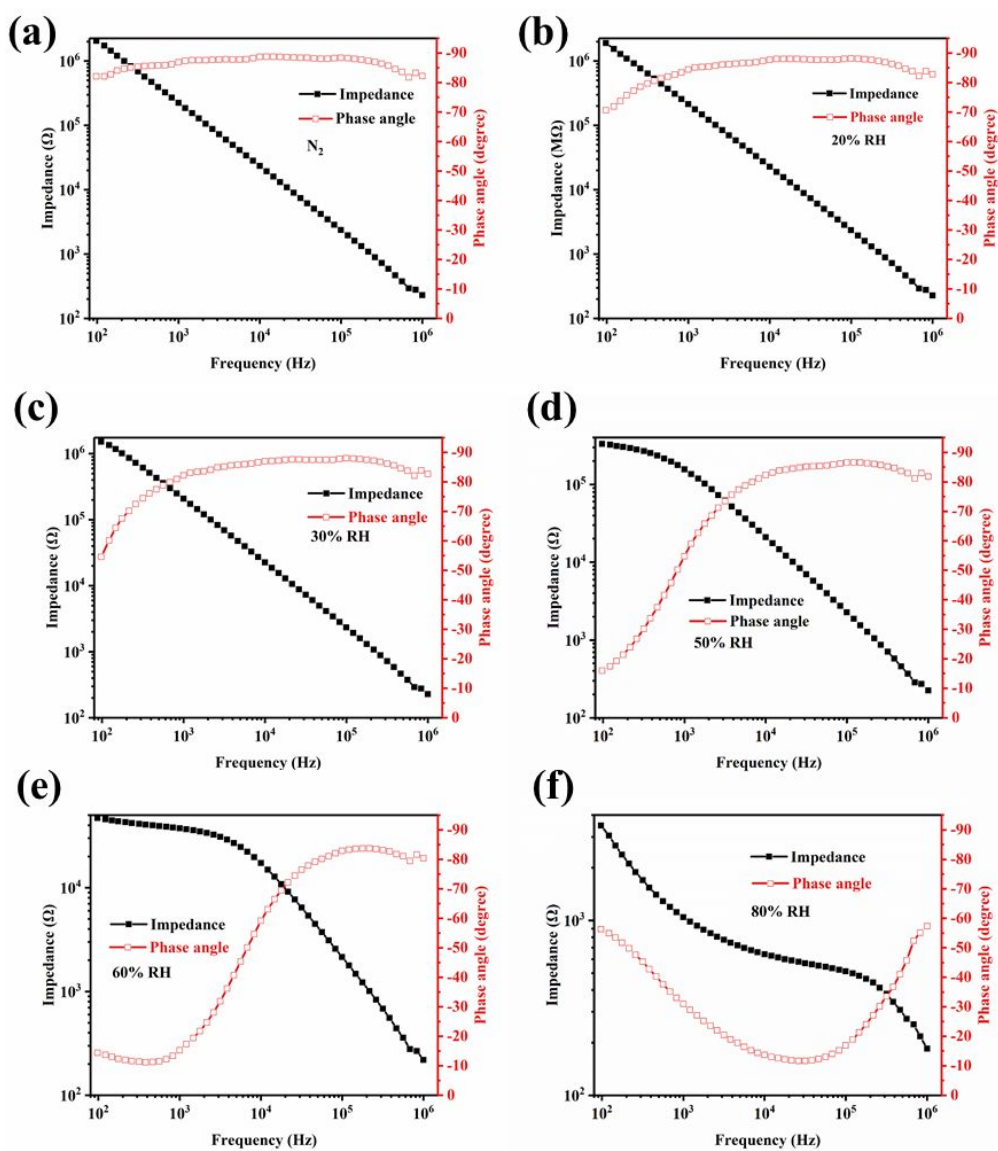

**Figure S10.** Bode plots of MoS<sub>2</sub>-PEO sensor at (a) N<sub>2</sub>, (b) 20%RH, (c) 30%RH, (d) 50%RH, (e) 60%RH and (f) 80%RH.

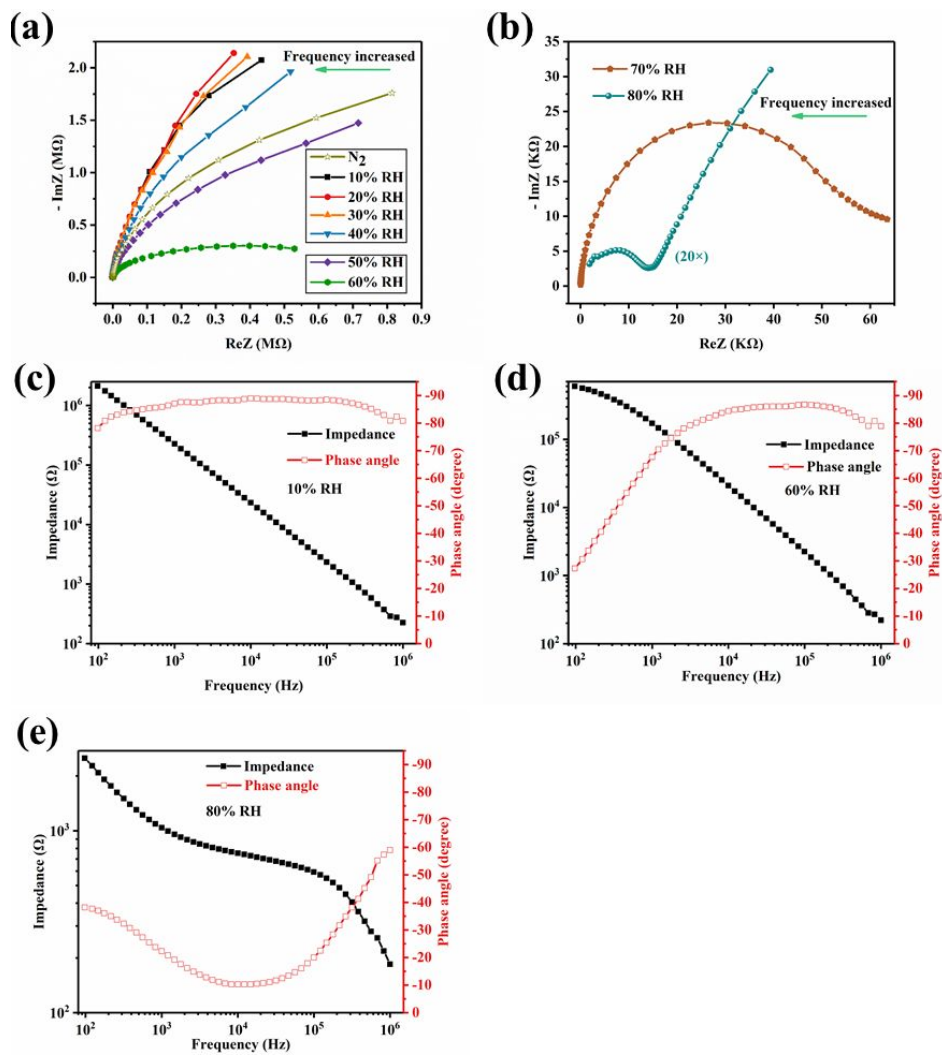

**Figure S11.** (a-b) CIS plots of MoS<sub>2</sub> sensor at different RH, bode plots of MoS<sub>2</sub> sensor at (c) 10%RH, (d) 60%RH and (e) 80%RH.

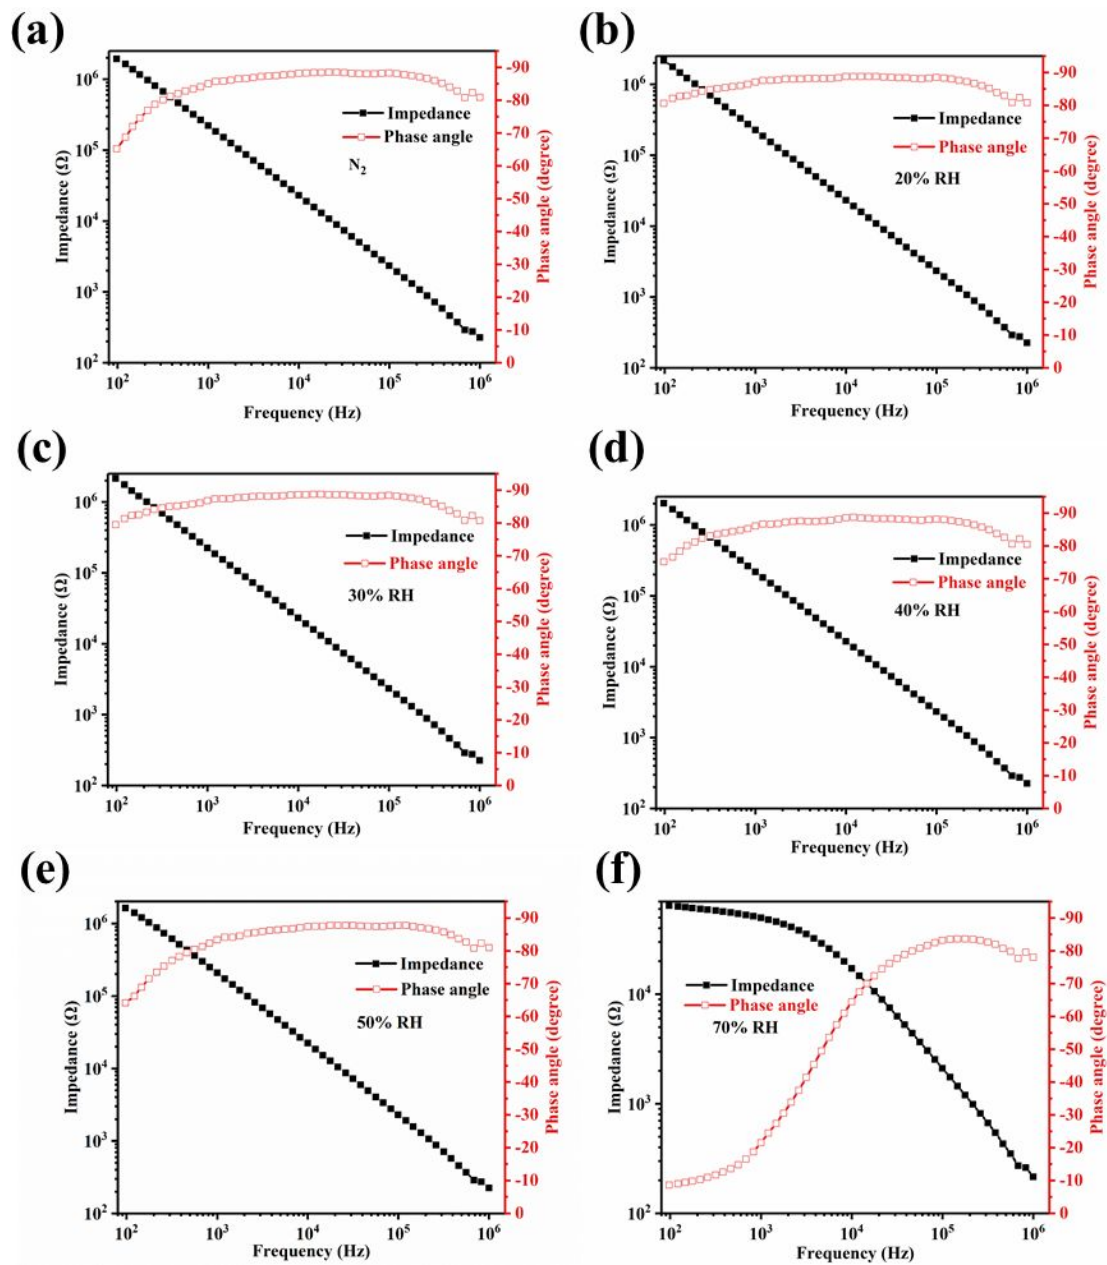

**Figure S12.** Bode plots of MoS<sub>2</sub> sensor at (a) N<sub>2</sub>, (b) 20%RH, (c) 30%RH, (d) 40%RH, (e) 50%RH and (f) 70%RH.
